# Supplementary material for: Drosophila melanogaster as a model for studies related to the toxicity of lavender, ginger and copaiba essential oils
Source: PubMed Central journal article supplement (PMC10538661; doi:10.1371/journal.pone.0291242), 2023-09-28
Supplement: pone.0291242.s001.pdf [file pone.0291242.s001.pdf]

## Aromatic Plant Research Center

We provide uncompromising  
quality control for your products.

---

**Customer** : doTERRA International  
**Lot Number** : 202615  
**Date Filled** : 09/17/2020

**Column** : ZB5 (60 m length × 0.25 mm inner diameter × 0.25 µm film thickness)  
**Instrument** : Shimadzu GCMS-QP2010 Ultra  
**Carrier gas** : Helium 80 psi  
**Temperature ramp** : 2 degrees celsius per minute up to 260-degrees celsius  
**Split ratio** : 30:1  
**Sample preparation** : 5%w/v solution with Dichloromethane.

**Comments:**

The analysis of this Copaiba lot revealed no contaminants or adulteration.  
The sample meets the expected chemical profile for authentic essential oils of Copaiifera species.

**Analysied by** : Ambika Poudel  
**Reviewed by** : Dr. Prabodh Satyal

# Copaiba Essential Oil

Customer : doTERRA International

Lot Number : 202615

Date Filled : 09/17/2020

## Chromatogram

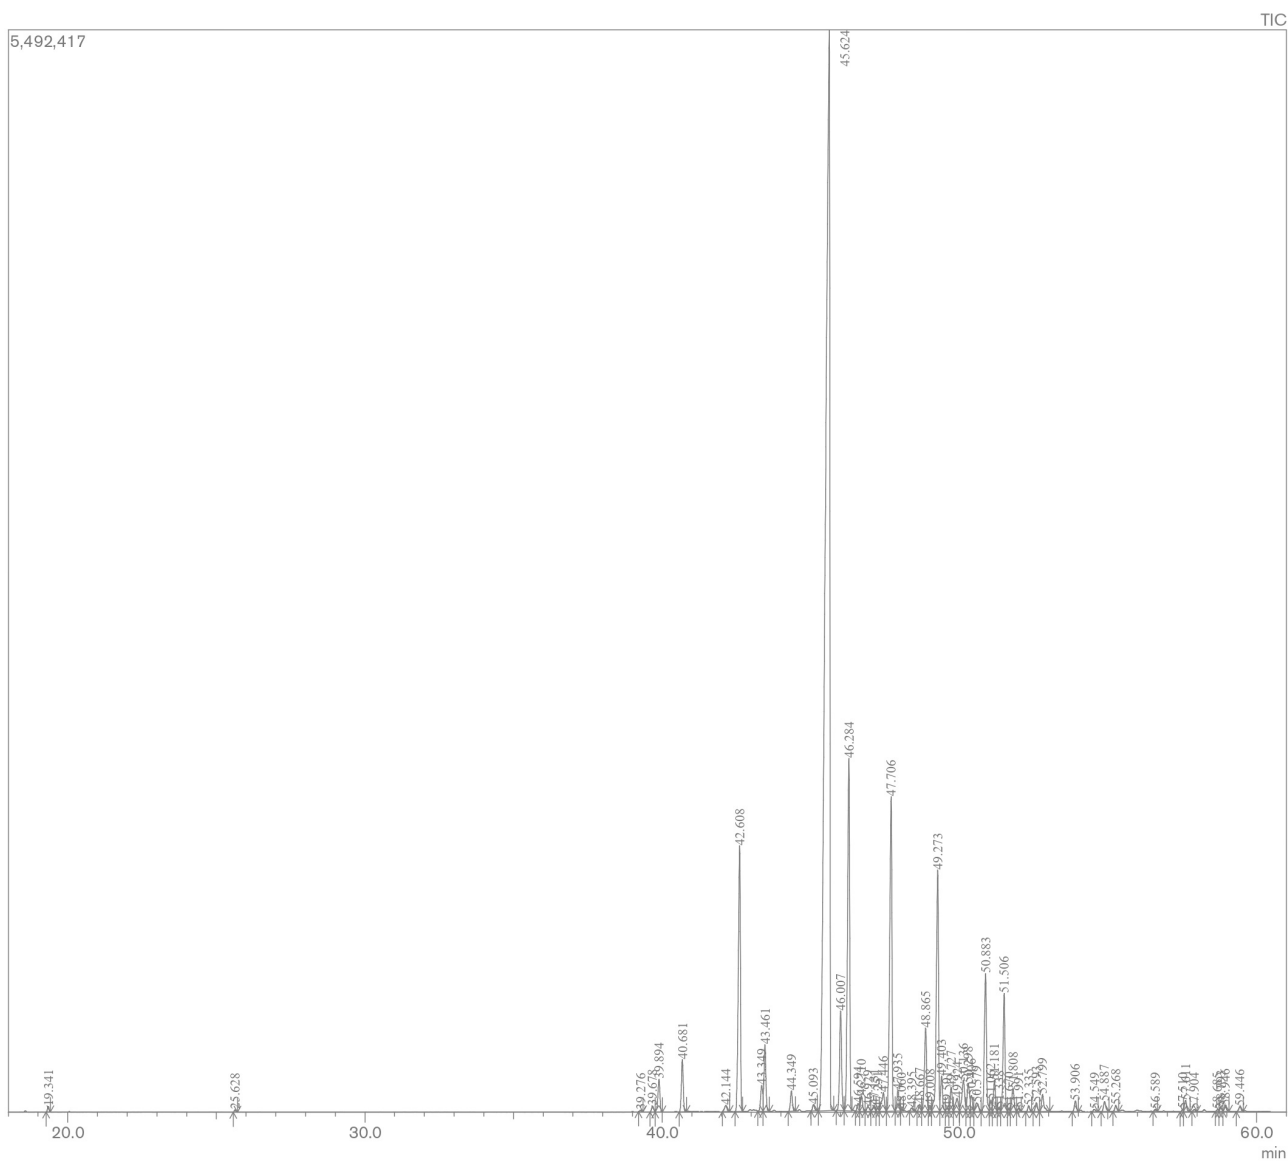

## Peak Report

| Peak# | R.Time | Name                        | Area%  |
|-------|--------|-----------------------------|--------|
| 1     | 19.341 | cis-beta-Ocimene            | 0.09   |
| 2     | 25.628 | allo-Ocimene                | 0.04   |
| 3     | 39.276 | Bicyclo nonane              | 0.03   |
| 4     | 39.678 | Bicycloelemene              | 0.12   |
| 5     | 39.894 | delta-Elemene               | 0.68   |
| 6     | 40.681 | alpha-Cubebene              | 1.05   |
| 7     | 42.144 | alpha-Ylangene              | 0.16   |
| 8     | 42.608 | alpha-Copaene               | 5.77   |
| 9     | 43.349 | beta-Cubebene               | 0.55   |
| 10    | 43.461 | beta-Elemene                | 1.40   |
| 11    | 44.349 | Cyperene                    | 0.43   |
| 12    | 45.093 | cis-alpha-Bergamotene       | 0.14   |
| 13    | 45.624 | beta-Caryophyllene          | 49.24  |
| 14    | 46.007 | gamma-Elemene               | 2.14   |
| 15    | 46.284 | trans-alpha-Bergamotene     | 7.94   |
| 16    | 46.594 | Aromadendrene               | 0.16   |
| 17    | 46.710 | cis-beta-Farnesene          | 0.32   |
| 18    | 46.929 | beta-Humulene               | 0.12   |
| 19    | 47.131 | epi-beta-Santalene          | 0.14   |
| 20    | 47.251 | trans-Muurolo-3,5-diene     | 0.06   |
| 21    | 47.446 | trans-beta-Farnesene        | 0.56   |
| 22    | 47.706 | alpha-Humulene              | 7.22   |
| 23    | 47.935 | allo-Aromadendrene          | 0.45   |
| 24    | 48.060 | cis-Muurolo-4(14),5-diene   | 0.03   |
| 25    | 48.395 | Elemene isomer              | 0.06   |
| 26    | 48.667 | cis-Cadina-1(6),4-diene     | 0.15   |
| 27    | 48.865 | trans-Cadina-1(6),4-diene   | 1.89   |
| 28    | 49.008 | gamma-Curcumene             | 0.13   |
| 29    | 49.273 | Germacrene D                | 5.54   |
| 30    | 49.403 | cis-cis-alpha-Farnesene     | 0.76   |
| 31    | 49.591 | delta-Selinene              | 0.07   |
| 32    | 49.727 | beta-Selinene               | 0.51   |
| 33    | 49.924 | trans-Muurolo-4(14),5-diene | 0.44   |
| 34    | 50.136 | Bicyclogermacrene           | 0.93   |
| 35    | 50.298 | alpha-Muurolo               | 0.69   |
| 36    | 50.406 | cis-alpha-Bisabolene        | 0.32   |
| 37    | 50.579 | beta-Cadinene               | 0.29   |
| 38    | 50.883 | beta-Bisabolene             | 3.07   |
| 39    | 51.062 | cis-gamma-Bisabolene        | 0.23   |
| 40    | 51.181 | gamma-Cadinene              | 0.64   |
| 41    | 51.338 | Copaiba Sesquiterpenoid 1   | 0.08   |
| 42    | 51.506 | delta-Cadinene              | 2.49   |
| 43    | 51.670 | trans-Calamenene            | 0.05   |
| 44    | 51.808 | beta-Sesquiphellandrene     | 0.56   |
| 45    | 51.991 | trans-gamma-Bisabolene      | 0.06   |
| 46    | 52.335 | trans-Cadina-1,4-diene      | 0.12   |
| 47    | 52.593 | alpha-Cadinene              | 0.19   |
| 48    | 52.799 | trans-alpha-Bisabolene      | 0.44   |
| 49    | 53.906 | Germacrene B                | 0.23   |
| 50    | 54.549 | Maaliol                     | 0.06   |
| 51    | 54.887 | Caryophyllene alcohol       | 0.24   |
| 52    | 55.268 | Caryophyllene oxide         | 0.12   |
| 53    | 56.589 | Ledol                       | 0.03   |
| 54    | 57.510 | Widdrol isomer              | 0.04   |
| 55    | 57.611 | Humulane-1,6-dien-3-ol      | 0.26   |
| 56    | 57.904 | 1-epi-Cubenol               | 0.04   |
| 57    | 58.685 | alpha-Muurolo               | 0.04   |
| 58    | 58.793 | epi-alpha-Muurolo           | 0.10   |
| 59    | 58.946 | delta-Cadinol               | 0.12   |
| 60    | 59.446 | alpha-Cadinol               | 0.12   |
|       |        |                             | 100.00 |
