# Supplementary material for: Drosophila melanogaster as a model for studies related to the toxicity of lavender, ginger and copaiba essential oils
Source: PubMed Central journal article supplement (PMC10538661; doi:10.1371/journal.pone.0291242), 2023-09-28
Supplement: pone.0291242.s002.pdf [file pone.0291242.s002.pdf]

# Aromatic Plant Research Center

We provide uncompromising  
quality control for your products.

---

**Customer:** doTERRA International

**Lot Number:** 2183052

**Date Filled:** 43404

**Column:** ZB5 (60 m length × 0.25 mm inner diameter × 0.25 µm film thickness)

**Instrument:** Shimadzu GCMS-QP2010 Ultra

**Carrier gas:** Helium 80 psi

**Temperature ramp:** 2 degrees celsius per minute up to 260-degrees celsius

**Split ratio:** 30:1

**Sample preparation:** 5%w/v solution with Dichloromethane.

**Comments:**

The analysis of this GINGER lot revealed no contaminants or adulteration.

The sample meets the expected chemical profile for authentic essential oils of *Zingiber officinale*.

# GINGER Essential Oil

Customer: doTERRA International  
 Lot Number: 2183052  
 Date Filled: 43404

## Chromatogram

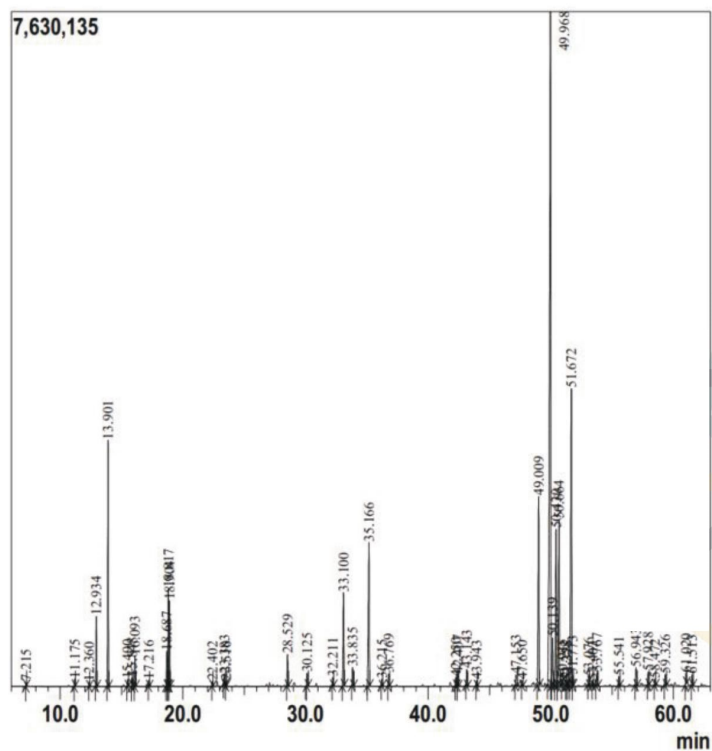

## Peak Report

| Ret.Time    | Compound Name                    | Area % |
|-------------|----------------------------------|--------|
| 7.215       | Hexanal                          | 0.08   |
| 11.175      | 2-Heptanol                       | 0.15   |
| 12.36       | Tricyclene                       | 0.09   |
| 12.934      | alpha-Pinene                     | 1.6    |
| 13.901      | Camphene                         | 5.97   |
| 15.49       | beta-Pinene                      | 0.16   |
| 15.848      | 6-methyl-Hept-5-en-2-one         | 0.21   |
| 16.093      | Myrcene                          | 0.75   |
| 17.216      | alpha-Phellandrene               | 0.14   |
| 18.687      | Limonene                         | 1.02   |
| 18.817      | beta-Phellandrene                | 2.76   |
| 18.904      | 1,8-Cineole                      | 2.16   |
| 22.402      | Terpinolene                      | 0.12   |
| 23.383      | 2-Nonanone                       | 0.29   |
| 23.51       | Linalool                         | 0.11   |
| 28.529      | Borneol                          | 0.99   |
| 30.125      | alpha-Terpineol                  | 0.39   |
| 32.211      | Citronellol                      | 0.24   |
| 33.1        | Neral                            | 3.12   |
| 33.835      | Geraniol                         | 0.56   |
| 35.166      | Geranial                         | 5.31   |
| 36.215      | Bornyl acetate                   | 0.18   |
| 36.769      | 2-Undecanone                     | 0.36   |
| 42.205      | alpha-Copaene                    | 0.27   |
| 42.407      | Geranyl acetate                  | 0.34   |
| 43.143      | beta-Elemene                     | 0.51   |
| 43.943      | Sesquithujene                    | 0.15   |
| 47.153      | trans-beta-Farnesene             | 0.55   |
| 47.655      | Alloaromadendrene                | 0.14   |
| 49.009      | Ar-Curcumene                     | 7.07   |
| 49.968      | alpha-Zingiberene                | 34.19  |
| 50.139      | alpha-Murolene                   | 1.79   |
| 50.43       | trans-trans-alpha-Farnesene      | 5.52   |
| 50.664      | beta-Bisabolene                  | 6.13   |
| 50.915      | gamma-Cadinene                   | 0.19   |
| 51.258      | delta-Cadinene                   | 0.1    |
| 51.375      | alpha-Panasinsen                 | 0.16   |
| 51.672      | beta-Sesquiphellandrene          | 12.33  |
| 51.773      | trans-gamma-Bisabolene           | 0.24   |
| 53.076      | alpha-Elemol                     | 0.26   |
| 53.403      | cis-Sesquibinene hydrate         | 0.12   |
| 53.767      | trans-Nerolidol                  | 0.61   |
| 55.541      | trans-Sesquibinene hydrate       | 0.29   |
| 56.943      | Zingiberenol                     | 0.59   |
| 57.928      | 7-epi-cis-sesquibinene hydrate   | 0.43   |
| 58.472      | Zingerone                        | 0.18   |
| 59.326      | alpha-Eudesmol                   | 0.37   |
| 61.02       | 7-epi-trans-sesquibinene hydrate | 0.34   |
| 61.513      | 2-cis-6-cis-Farnesol             | 0.37   |
| Area Total: |                                  | 100    |

### Comments:

The analysis of this GINGER lot revealed no contaminants or adulteration.  
 The sample meets the expected chemical profile for authentic essential oils of *Zingiber officinale*.
