# Supplementary material for: Drosophila melanogaster as a model for studies related to the toxicity of lavender, ginger and copaiba essential oils
Source: PubMed Central journal article supplement (PMC10538661; doi:10.1371/journal.pone.0291242), 2023-09-28
Supplement: pone.0291242.s003.pdf [file pone.0291242.s003.pdf]

## Aromatic Plant Research Center

We provide uncompromising  
quality control for your products.

---

**Customer** : doTERRA International  
**Lot Number** : 2210191  
**Date Filled** : 01/19/2021

**Column** : ZB5 (60 m length × 0.25 mm inner diameter × 0.25 µm film thickness)  
**Instrument** : Shimadzu GCMS-QP2010 Ultra  
**Carrier gas** : Helium 80 psi  
**Temperature ramp** : 2 degrees celsius per minute up to 260-degrees celsius  
**Split ratio** : 30:1  
**Sample preparation** : 5%w/v solution with Dichloromethane.

**Comments:**

The analysis of this Lavender lot revealed no contaminants or adulteration.  
The sample meets the expected chemical profile for authentic essential oils of *Lavandula angustifolia*.

**Analysied by** : Ambika Poudel  
**Reviewed by** : Dr. Prabodh Satyal

# Lavender Essential Oil

Customer : doTERRA International

Lot Number : 2210191

Date Filled : 01/19/2021

## Chromatogram

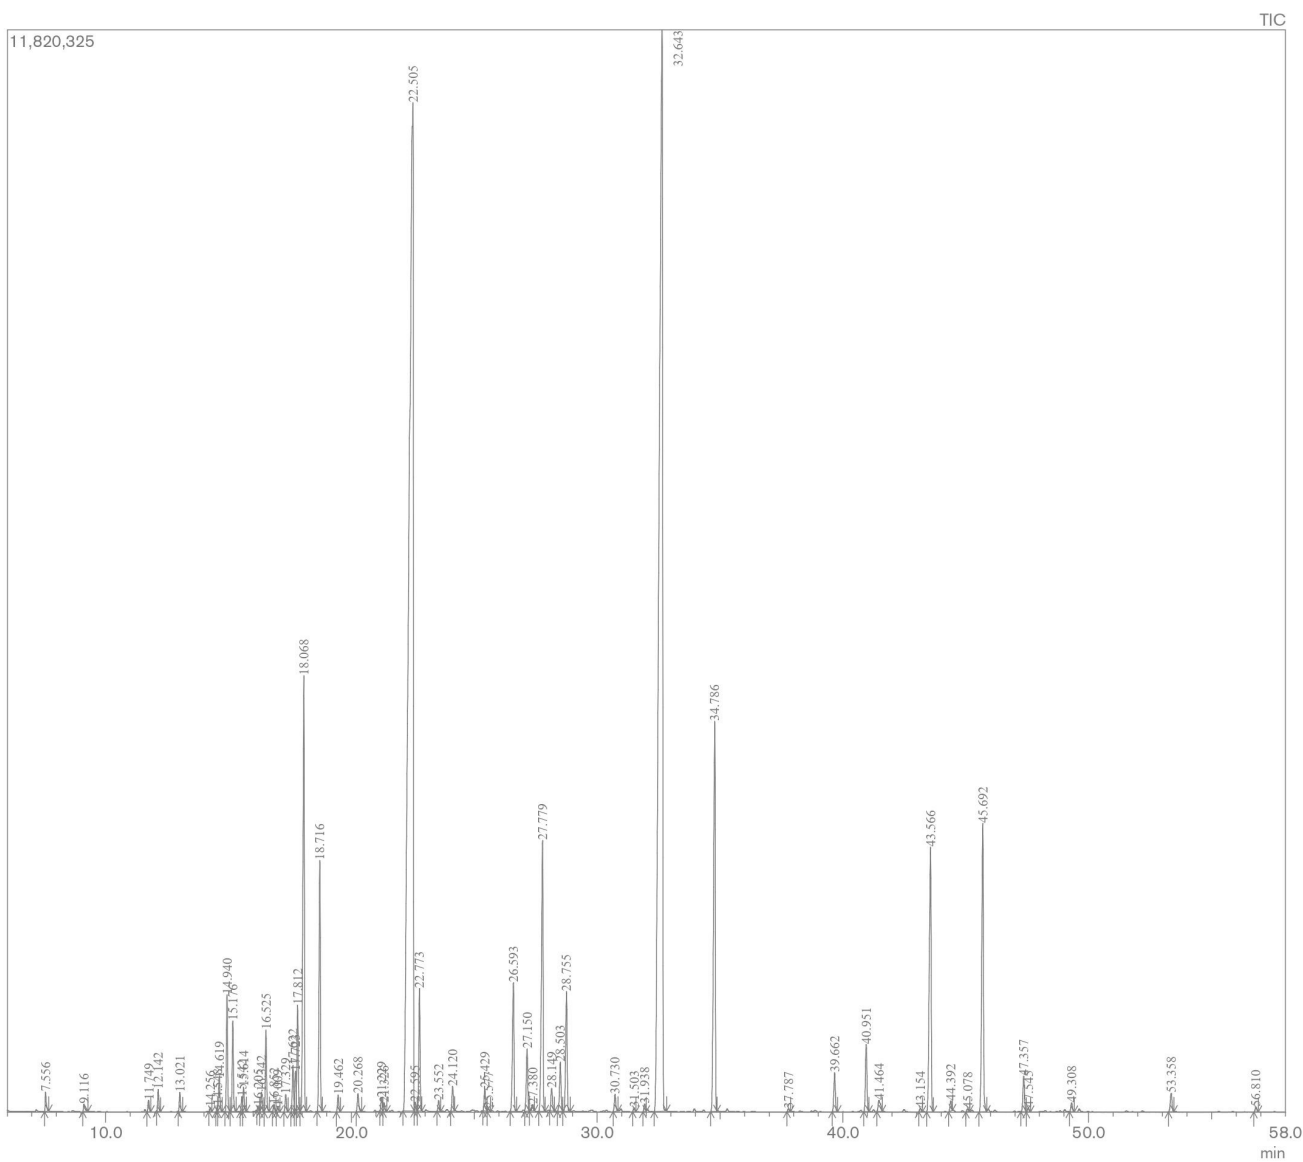

## Peak Report

| Peak# | R.Time | Name                             | Area%  |
|-------|--------|----------------------------------|--------|
| 1     | 7.556  | 1-Methoxy hexane                 | 0.15   |
| 2     | 9.116  | n-Hexanol                        | 0.08   |
| 3     | 11.749 | alpha-Thujene                    | 0.10   |
| 4     | 12.142 | alpha-Pinene                     | 0.19   |
| 5     | 13.021 | Camphene                         | 0.18   |
| 6     | 14.256 | Sabinene                         | 0.03   |
| 7     | 14.548 | beta-Pinene                      | 0.04   |
| 8     | 14.619 | 1-Octen-3-ol                     | 0.33   |
| 9     | 14.940 | 3-Octanone                       | 1.05   |
| 10    | 15.176 | Myrcene                          | 0.82   |
| 11    | 15.542 | Butyl butanoate                  | 0.13   |
| 12    | 15.614 | 3-Octanol                        | 0.23   |
| 13    | 16.205 | alpha-Phellandrene               | 0.04   |
| 14    | 16.342 | delta-3-Carene                   | 0.18   |
| 15    | 16.525 | Hexyl acetate                    | 0.76   |
| 16    | 16.852 | alpha-Terpinene                  | 0.06   |
| 17    | 17.009 | meta-Cymene                      | 0.05   |
| 18    | 17.329 | para-Cymene                      | 0.17   |
| 19    | 17.622 | Limonene                         | 0.46   |
| 20    | 17.723 | beta-Phellandrene                | 0.38   |
| 21    | 17.812 | 1,8-Cineole                      | 0.99   |
| 22    | 18.068 | cis-beta-Ocimene                 | 4.71   |
| 23    | 18.716 | trans-beta-Ocimene               | 2.49   |
| 24    | 19.462 | gamma-Terpinene                  | 0.16   |
| 25    | 20.268 | cis-Linalool oxide (furanoid)    | 0.20   |
| 26    | 21.229 | Terpinolene                      | 0.13   |
| 27    | 21.326 | trans-Linalool oxide (furanoid)  | 0.10   |
| 28    | 22.505 | Linalool                         | 33.03  |
| 29    | 22.595 | Hexyl propionate+Hotrienol       | 0.09   |
| 30    | 22.773 | 1-Octen-3-yl acetate             | 1.15   |
| 31    | 23.552 | 3-Octanol acetate                | 0.10   |
| 32    | 24.120 | allo-Ocimene                     | 0.24   |
| 33    | 25.429 | Camphor                          | 0.25   |
| 34    | 25.577 | 4-Isopropyl-3-cyclohexen-1-one   | 0.03   |
| 35    | 26.593 | Lavandulol                       | 1.49   |
| 36    | 27.150 | Borneol                          | 0.67   |
| 37    | 27.380 | 3-trans-5-cis-1,3,5-Undecatriene | 0.07   |
| 38    | 27.779 | Terpinen-4-ol                    | 3.28   |
| 39    | 28.149 | Cryptone                         | 0.25   |
| 40    | 28.503 | Hexyl butanoate                  | 0.54   |
| 41    | 28.755 | alpha-Terpineol                  | 1.35   |
| 42    | 30.730 | Nerol                            | 0.19   |
| 43    | 31.503 | Hexyl 2-methyl butanoate         | 0.04   |
| 44    | 31.938 | Cumin aldehyde                   | 0.09   |
| 45    | 32.643 | Linalyl acetate                  | 28.20  |
| 46    | 34.786 | Lavandulyl acetate               | 5.00   |
| 47    | 37.787 | Hexyl tiglate                    | 0.03   |
| 48    | 39.662 | Neryl acetate                    | 0.42   |
| 49    | 40.951 | Geranyl acetate                  | 0.73   |
| 50    | 41.464 | Hexyl hexanoate                  | 0.19   |
| 51    | 43.154 | cis-alpha-Bergamotene            | 0.04   |
| 52    | 43.566 | beta-Caryophyllene               | 3.66   |
| 53    | 44.392 | trans-alpha-Bergamotene          | 0.11   |
| 54    | 45.078 | cis-beta-Farnesene               | 0.03   |
| 55    | 45.692 | trans-beta-Farnesene             | 3.66   |
| 56    | 47.357 | Germacrene D                     | 0.41   |
| 57    | 47.545 | trans-beta-Bergamotene           | 0.05   |
| 58    | 49.308 | gamma-Cadinene                   | 0.10   |
| 59    | 53.358 | Caryophyllene oxide              | 0.23   |
| 60    | 56.810 | epi-alpha-Cadinol                | 0.06   |
|       |        |                                  | 100.00 |
